# Supplementary material
Source: Research Square preprint supplement (doi:10.21203/rs.3.rs-8758549/v1)
Supplement: Supplementary file 1 [file 9dc544d172202400fa0812c1.xlsx]

## Sheet: PYS Plant ID
Name	Life-Form		Notes
Asparagus racemosus	Climber		A botanical survey was conducted in and around Panga ya Saidi by Mathias Ngonyo (ngomat2m@yahoo.com) in 2013 as part of the Sealinks Project. The survey documented that plant community composition and biodiversity of species growing both within and outside the cave. Due to limiting factors like space and sunlight availability, only a few species can survive within the cave despite it being open-a…
Cissus rotundifolia	Climber
Cynanchum insipidum	Climber
Cyphostemma hildebrandtii	Climber
Dalechampia scandens	Climber
Hibiscus altissimus	Climber
Hoslundia opposita	Climber
Jasminum fluminense	Climber
Opilia amentacea	Climber
Paullinia pinnata	Climber		For "Life-Form" we use a plant habit classification that considers the general form of a plant, encompassing a variety of components such as stem duration, branching pattern, development, or texture. These forms include: Climber - Herbaceous plants with no specialized climbing mechanism that may exhibit twining, clinging, scrambling or tendril behavior. Cycads - Seed plants with a stout, woody, a…
Pentarhopalopilia umbellulata	Climber
Rhynchosia hirta	Climber
Schizostephanus alatus	Climber
Schlechterina mitostemmatoides	Climber
Secamone punctulata	Climber
Secamone schweinfurthii	Climber
Solanecio angulatus	Climber
Stephanotis rubicunda	Climber
Tragia furialis	Climber
Triaspis mozambica	Climber
Encephalartos hildebrandtii	Cycad
Dorstenia hildebrandtii	Epiphyte
Adenia kirkii	Geophyte
Adenia lindiensis	Geophyte
Anchomanes abbreviatus	Geophyte
Coccinea grandis	Geophyte
Cyphostemma adenocaule	Geophyte
Dracaena conspicua	Geophyte
Eulophia petersii	Geophyte
Gonatopus boivinii	Geophyte
Ipomoea cairica	Geophyte
Ipomoea mauritiana	Geophyte
Kedrostis heterophylla	Geophyte
Momordica trifoliolata	Geophyte
Scadoxus multiflorus	Geophyte
Talinum portulacifolium	Geophyte
Zehneria pallidinervia	Geophyte
Amorphophalus maximus	Herb
Chlorophytum sp.	Herb
Elytraria minor	Herb
Impatiens walleriana	Herb
Indigofera trita	Herb
Laportea lanceolata	Herb
Leucas glabrata	Herb
Melochia corchorifolia	Herb
Pouzolzia fadenii	Herb
Psilotrichum scleranthum	Herb
Ruellia prostrata	Herb
Zamioculcas zamiifolia	Herb
Adenia gummifera	Liana
Ancylobotrys tayloris	Liana
Cissus aralioides	Liana
Cissus integrifolia	Liana
Cissus sciaphila	Liana
Cissus sylvicola	Liana
Dichapetalum fadenii	Liana
Gymnema sylvestre	Liana
Hyalosepalum oblongifolium	Liana
Ipomoea urbaniana	Liana
Jateorhiza palmata	Liana
Pristimera andongensis	Liana
Rhoicissus revoilii	Liana
Salacia elegans	Liana
Strophanthus kombe	Liana
Tiliacora funifera	Liana
Uvaria acuminata	Liana
Abutilon mauritianum	Shrub
Acacia brevispica	Shrub
Acalypha fruticosa	Shrub
Acalypha neptunica	Shrub
Allophylus rubifolius	Shrub
Buxus obtusifolia	Shrub
Capparis fascicularis	Shrub
Carpolobia goetzei	Shrub
Coffea sessiliflora	Shrub
Combretum illairii	Shrub
Commiphora africana	Shrub
Commiphora kua	Shrub
Cordia monoica	Shrub
Craibia brevicaudata	Shrub
Cyathula cylindrica	Shrub
Dalbergia vacciniifolia	Shrub
Dombeya taylorii	Shrub
Dovyalis hispidula	Shrub
Ehretia bakeri	Shrub
Eumachia ubrupta	Shrub
Euphorbia pereskiifolia	Shrub
Flacourtia indica	Shrub
Flieggea virosa	Shrub
Grandidiera boivinii	Shrub
Grewia arborea	Shrub
Grewia holstii	Shrub
Grewia villosa	Shrub
Gymnosporia heterophylla	Shrub
Gymnosporia mossambicensis	Shrub
Harrisonia abyssinica	Shrub
Heinsia crinita	Shrub
Hibiscus tiliaceus	Shrub
Hijmania alta	Shrub
Jasminum punctulatum	Shrub
Jeffreycia hildebrandtii	Shrub
Justicia pseudorungia	Shrub
Lantana viburnoides	Shrub
Maerua triphylla	Shrub
Mallotus oppositifolius	Shrub
Memecylon fragrans	Shrub
Meyna tetraphylla	Shrub
Nectaropetalum kaessneri	Shrub
Ocimum gratissimum	Shrub
Ormocarpum sennoides	Shrub
Oxyanthus pyriformis	Shrub
Pavetta crebrifolia	Shrub
Pseuderanthemum hildebrandtii	Shrub
Psychotria amboniana	Shrub
Rhodopentas bussei	Shrub
Rytigynia mrimaensis	Shrub
Vepris amaniensis	Shrub
Bridellia cathartica	Shrub or Small Tree
Clausena anisata	Shrub or Small Tree
Combretum schumannii	Shrub or Small Tree
Commiphora edulis	Shrub or Small Tree
Coptosperma graveolens	Shrub or Small Tree
Coptosperma graveolens	Shrub or Small Tree
Deinbollia borbonica	Shrub or Small Tree
Diospyros squarrosa	Shrub or Small Tree
Empogona ovalifolia	Shrub or Small Tree
Grewia forbesii	Shrub or Small Tree
Gymnosporia buchananii	Shrub or Small Tree
Haplocoelum inoploeum	Shrub or Small Tree
Markhamia zanzibarica	Shrub or Small Tree
Mildbraedia carpinifolia	Shrub or Small Tree
Mkilua fragrans	Shrub or Small Tree
Ozoroa obovata	Shrub or Small Tree
Phyllanthus reticulatus	Shrub or Small Tree
Pleiocarpa pycnantha	Shrub or Small Tree
Polysphaeria parvifolia	Shrub or Small Tree
Premna chrysoclada	Shrub or Small Tree
Pycnocoma littoralis	Shrub or Small Tree
Rinorea ilicifolia	Shrub or Small Tree
Rothmannia ravae	Shrub or Small Tree
Tabernaemontana elegans	Shrub or Small Tree
Terminalia prunioides	Shrub or Small Tree
Thylachium thomasii	Shrub or Small Tree
Turraea wakefieldii	Shrub or Small Tree
Uvariodendron kirkii	Shrub or Small Tree
Vangueria randii	Shrub or Small Tree
Vitex strickeri	Shrub or Small Tree
Zanthoxylum holtzianum	Shrub or Small Tree
Ziziphus mucronata	Shrub or Small Tree
Cissus quadrangularis	Succulent
Cynanchum viminale	Succulent
Euphorbia wakefieldii	Succulent
Kalanchoe lateritia	Succulent
Adansonia digitata	Tree
Afzelia quanzensis	Tree
Albizia anthelmintica	Tree
Asteranthe asterias	Tree
Canthium mombazense	Tree
Cladostemon kirkii	Tree
Cola minor	Tree
Cola pseudoclavata	Tree
Commiphora eminnii	Tree
Cordyla africana	Tree
Cussonia zimmermannii	Tree
Cynometra webberi	Tree
Diospyros abyssinica	Tree
Dracaena aletriformis	Tree
Drypetes parvifolia	Tree
Ficus bubu	Tree
Ficus cordata	Tree
Ficus lingua	Tree
Ficus lutea	Tree
Ficus polita	Tree
Gyrocarpus americanus	Tree
Lannea schweinfurthii	Tree
Lannea welwitschii	Tree
Lecaniodiscus fraxinifolius	Tree
Manilkara mochisia	Tree
Manilkara sulcata	Tree
Milicia excelsa	Tree
Oxyanthus zanguebaricus	Tree
Pandanus kirkii	Tree
Sterculia africana	Tree
Sterculia appendiculata	Tree
Strichnos spinosa	Tree
Trichilia emetica	Tree
Vangueria loranthifolia	Tree
