# Supplementary material
Source: Research Square preprint supplement (doi:10.21203/rs.3.rs-8758549/v1)
Supplement: Supplementary file 2 [file e3f5154b527cdfebf4a77c4a.xlsx]

## Sheet: Table 1
Table 1. Ages⁵⁹, biomarker metrices, and carbon and hydrogen isotope values and standard deviation of the mean and weighted average for each Panga ya Saidi archaeological biomarker sample.
Sample		Age		Average Chain Length & Carbon Preference Index		Ratio Values			Fatty Acid Biosynthesis		Mean δ¹³C (‰ vs. VPDB) & Standard Deviation															Mean δD (‰ vs. VSMOW) & Standard Deviation
						Cₙ ÷ (C₂₉+C₃₁+C₃₃)
Depth (cm)	Layer	MIS	Sub-Stage	ACL₂₀₋₃₄	CPI₂₀₋₃₄	C₂₈	C₃₀	C₃₂	STR₂₄	ATR₁₆₋₁₈	C₂₈ Avg.				C₃₀ Avg.				C₃₂ Avg				C₂₈₋₃₂ Wt. Avg.			C₂₈ Avg.				C₃₀ Avg.				C₃₂ Avg			C₂₈₋₃₂ Wt. Avg.
5-7	1	1	Iron Age	27.9755	2.27539	0.299138	0.392368	0.308494	0.109807	0.291491	-30.0677	±	0.10579		-31.186	±	0.0519923		-32.8427	±	0.149932		-31.3626	±	1.64487	-126.101	±	1.96625		-112.137	±	1.68651						-118.178	±	6.41877
12-14	3			29.4986	2.0964	0.246578	0.384955	0.368467	0.0647964	0.242839	-29.4502	±	0.0800002		-30.2009	±	0.0900311		-31.6541	±	0.0337328		-30.5512	±	2.53057	-119.144	±	3.94011		-97.3035	±	1.19837						-105.831	±	9.04598
19-21	4		Mid Holocene	29.4412	2.4678	0.25271	0.391833	0.355457	0.0617858	0.238411	-29.2396	±	0.137384		-30.3454	±	0.152107		-31.8675	±	0.211062		-30.607	±	2.4525	-119.009	±	5.03193		-117.279	±	3.82075						-117.957	±	17.4202
26-28	5 upper		Early Holocene	29.3426	1.97157	0.270763	0.385601	0.343636	0.0708033	0.484935	-28.6849	±	0.0617851		-29.5211	±	0.0519985		-30.6606	±	0.13757		-29.6863	±	1.89149	-116.236	±	5.59943		-106.002	±	3.78813		-132.796	±	2.25563		-117.981	±	7.20632
33-35	5 mid			29.6595	1.80254	0.254279	0.381194	0.364527	0.0589086	0.287735	-28.8803	±	0.0400635		-29.6281	±	0.129276		-30.9654	±	0.0244765		-29.9254	±	2.27896	-120.35	±	4.33152		-119.782	±	8.21895		-110.694	±	3.70159		-116.613	±	7.63724
40-42	5 lower	2	Terminal Pleistocene	29.4217	1.87028	0.262238	0.386135	0.351627	0.0640577	0.356097	-29.5767	±	0.0718251		-29.9724	±	0.0887694		-31.0524	±	0.121608		-30.2484	±	2.04136	-118.867	±	0.592729		-103.848	±	7.87597						-109.923	±	9.73643
47-49	6			29.3624	1.96604	0.271955	0.374589	0.353456	0.062395	0.451346	-28.9418	±	0.188334		-29.5796	±	0.0862685		-30.6695	±	0.127934		-29.7913	±	1.78768	-113.52	±	3.5663		-111.399	±	2.57373		-108.013	±	2.38003		-110.779	±	5.53545
54-56	7 upper			29.3966	1.97517	0.254512	0.377481	0.368007	0.056152	0.6043	-28.9951	±	0.0995697		-29.7244	±	0.136655		-30.937	±	0.206725		-29.9851	±	2.2665	-114.804	±	3.3107		-117.995	±	2.17059		-115.321	±	1.18854		-116.199	±	8.30614
61-63	7 lower			29.5763	1.72776	0.254528	0.363841	0.381631	0.0614215	0.387673	-29.1694	±	0.153372		-29.7132	±	0.103965		-30.8559	±	0.157883		-30.0109	±	2.28514	-114.421	±	3.67316		-124.374	±	0.854183						-120.277	±	18.4439
68-70	8		LGM	29.1957	1.9382	0.36789	0.333178	0.298931	0.0567297	0.487589	-28.9829	±	0.0671333		-29.7401	±	0.0276974		-30.5186	±	0.0666386		-29.6942	±	0.769841	-72.0672	±	2.96236		-82.4298	±	7.38703						-76.9919	±	0.959213
82-84	9 lower	3	Late MIS 3	29.3916	1.71629	0.274835	0.384722	0.340443	0.0571512	0.423948	-29.0242	±	0.123969		-29.7125	±	0.0833788		-30.4968	±	0.101623		-29.7903	±	1.77096	-103.917	±	7.72697		-104.413	±	2.95125		-82.1085	±	4.58867		-96.6835	±	6.88496
89-91	10 upper			29.6964	1.69563	0.245005	0.376308	0.378687	0.0512433	0.28054	-29.4709	±	0.0278229		-30.1064	±	0.0601231		-30.9133	±	0.0695048		-30.2563	±	2.48824	-104.467	±	3.83791		-100.818	±	7.81638		-94.6245	±	0.0225672		-99.3664	±	6.6033
103-105	10 lower		Mid MIS 3	29.4264	1.70722	0.273078	0.367148	0.359774	0.0529392	0.337656	-29.2017	±	0.107804		-30.0212	±	0.0917705		-30.6735	±	0.0279336		-30.0321	±	1.76356	-109.736	±	0.4363		-105.116	±	5.83204						-107.086	±	9.5277
110-112	11 upper			29.8962	1.72624	0.251875	0.383335	0.364789	0.0340846	0.357592	-28.829	±	0.0467787		-29.5294	±	0.0586418		-30.2408	±	0.0449393		-29.6125	±	2.26451	-105.087	±	1.34072		-105.878	±	3.11821		-106.63	±	4.90461		-105.953	±	7.70973
117-119	11 mid			29.5146	1.73561	0.277515	0.369348	0.353138	0.0475738	0.313249	-28.8691	±	0.097879		-29.5617	±	0.0772323		-30.1702	±	0.0572225		-29.5844	±	1.60747	-100.027	±	3.07191		-91.5021	±	2.06114						-95.1594	±	6.5994
124-126	11 lower			29.2594	1.64666	0.296864	0.384122	0.319014	0.0572687	0.28051	-28.6345	±	0.053074		-29.3005	±	0.0397557		-29.7559	±	0.0466615		-29.2481	±	1.39504	-101.222	±	2.93781		-108.178	±	5.42366		-83.6546	±	7.47551		-98.2896	±	7.79597
131-133	12 upper		Early MIS 3	29.5903	1.77099	0.275293	0.377111	0.347597	0.0464624	0.315801	-28.8029	±	0.157754		-29.2999	±	0.0332324		-29.6354	±	0.0330389		-29.2797	±	1.62895	-107.197	±	4.55783		-104.241	±	14.3603		-92.7149	±	1.12836		-101.049	±	5.05953
138-140	12 mid			29.6496	1.77633	0.261239	0.376585	0.362176	0.0550496	0.238228	-28.8721	±	0.0105765		-29.3894	±	0.00796152		-30.0433	±	0.0354161		-29.4911	±	1.98352	-103.041	±	2.0897		-114.151	±	7.68791						-109.601	±	17.8147
145-147	12 lower			28.7653	1.8472	0.318128	0.391833	0.290039	0.084253	0.215243	-28.3949	±	0.0765177		-29.1141	±	0.0245484		-29.7788	±	0.0379263		-29.0781	±	1.49852	-104.456	±	1.35129		-114.626	±	4.43866						-110.069	±	11.6369
